# Supplementary material
Source: Springer Nature journal article supplement (https://www.springermedizin.de/resource/supplementary/12903_2013_405_MOESM7_ESM.pdf/9516980)
Supplement: MOESM7 [file 9516980]

**Table 4: Predictors for Declining Recommended Dental Treatment in the Past Year Due to Cost, 2007/09**

| <b>Variables</b>                 | <b>Unadjusted Odds Ratio (95% CI)</b> | <b>P-value</b> | <b>Adjusted Odds Ratio (95% CI)</b> | <b>P-value</b> |
|----------------------------------|---------------------------------------|----------------|-------------------------------------|----------------|
| <b>Age*</b>                      |                                       |                |                                     |                |
| 6-19 (reference)                 |                                       |                |                                     |                |
| 20-39                            | 2.87 (1.98,4.16)                      | 0.001          | 1.85 (1.00,3.43)                    | 0.050          |
| 40-59                            | 2.75 (1.67,4.52)                      | 0.001          | 1.83 (1.03,3.25)                    | 0.042          |
| <b>Sex</b>                       |                                       |                |                                     |                |
| Males (reference)                |                                       |                |                                     |                |
| Females                          | 1.36 (1.09,1.69)                      | 0.011          | 1.47 (1.10,1.97)                    | 0.015          |
| <b>Immigrant Status</b>          |                                       |                |                                     |                |
| Non-Immigrant (reference)        |                                       |                |                                     |                |
| Immigrant                        | 1.15 (0.76,1.75)                      | 0.479          | 1.43 (1.05,1.95)                    | 0.028          |
| <b>Education</b>                 |                                       |                |                                     |                |
| > High school (reference)        |                                       |                |                                     |                |
| < High school                    | 0.63 (0.39,1.04)                      | 0.068          | 0.65 (0.05,0.82)                    | 0.002          |
| <b>Employment Status</b>         |                                       |                |                                     |                |
| Full-Time Employed (reference)   |                                       |                |                                     |                |
| Part-Time Employed               | 1.01 (0.52,1.97)                      | 0.964          | 1.37 (0.85,2.22)                    | 0.176          |
| Unemployed                       | 0.83 (0.66,1.05)                      | 0.104          | 1.23 (0.96,1.57)                    | 0.094          |
| <b>Income</b>                    |                                       |                |                                     |                |
| Higher (reference)               |                                       |                |                                     |                |
| Upper Middle                     | 2.05 (1.58,2.66)                      | 0.001          | 1.61 (1.25,2.08)                    | 0.002          |
| Lower Middle                     | 3.74 (2.49,5.60)                      | 0.001          | 2.95 (1.69,5.15)                    | 0.001          |
| Lower                            | 4.21 (2.73,6.50)                      | 0.001          | 2.64 (1.59,4.38)                    | 0.001          |
| <b>Insurance</b>                 |                                       |                |                                     |                |
| Private (reference)              |                                       |                |                                     |                |
| Public                           | 1.81 (0.99,3.30)                      | 0.054          | 1.21 (0.49,2.97)                    | 0.655          |
| None                             | 3.08 (2.39,3.99)                      | 0.001          | 2.35 (1.62,3.40)                    | 0.001          |
| <b>Self-Reported Oral Health</b> |                                       |                |                                     |                |
| Good to Excellent (reference)    |                                       |                |                                     |                |
| Fair to Poor                     | 4.11 (3.18,5.3)                       | 0.001          | 3.04 (2.34,3.94)                    | 0.001          |
| <b>Oral Health</b>               |                                       |                |                                     |                |
| D (decayed teeth)                | 1.09 (1.02,1.17)                      | 0.018          | 1.20 (1.13,1.28)                    | 0.001          |
| M (missing teeth)                | 1.04 (0.99,1.10)                      | 0.140          | 1.07 (1.05,1.1)                     | 0.001          |

\*Age groups 6-11 and 12-19 were combined for the logistic regression analyses since certain data was not collected for respondents aged 6-11 (i.e. income and employment status)
